# Amyloid- $\beta$ Inhibits No-cGMP Signaling in a CD36- and CD47-Dependent Manner

Thomas W. Miller<sup>1</sup>, Jeff S. Isenberg<sup>1,2</sup>, Hubert B. Shih<sup>1,3</sup>, Yichen Wang<sup>1</sup>, David D. Roberts<sup>1\*</sup>

**1** Laboratory of Pathology, Center for Cancer Research, National Cancer Institute, National Institutes of Health, Bethesda, Maryland, United States of America, **2** Department of Medicine, University of Pittsburgh School of Medicine, Pittsburgh, Pennsylvania, United States of America, **3** Howard Hughes Medical Institute–National Institutes of Health Research Scholars Program, Bethesda, Maryland, United States of America

## Abstract

Amyloid- $\beta$  interacts with two cell surface receptors, CD36 and CD47, through which the matricellular protein thrombospondin-1 inhibits soluble guanylate cyclase activation. Here we examine whether amyloid- $\beta$  shares this inhibitory activity. Amyloid- $\beta$  inhibited both drug and nitric oxide-mediated activation of soluble guanylate cyclase in several cell types. Known cGMP-dependent functional responses to nitric oxide in platelets and vascular smooth muscle cells were correspondingly inhibited by amyloid- $\beta$ . Functional interaction of amyloid- $\beta$  with the scavenger receptor CD36 was indicated by inhibition of free fatty acid uptake via this receptor. Both soluble oligomer and fibrillar forms of amyloid- $\beta$  were active. In contrast, amyloid- $\beta$  did not compete with the known ligand SIRP $\alpha$  for binding to CD47. However, both receptors were necessary for amyloid- $\beta$  to inhibit cGMP accumulation. These data suggest that amyloid- $\beta$  interaction with CD36 induces a CD47-dependent signal that inhibits soluble guanylate cyclase activation. Combined with the pleiotropic effects of inhibiting free fatty acid transport via CD36, these data provides a molecular mechanism through which amyloid- $\beta$  can contribute to the nitric oxide signaling deficiencies associated with Alzheimer's disease.

**Citation:** Miller TW, Isenberg JS, Shih HB, Wang Y, Roberts DD (2010) Amyloid- $\beta$  Inhibits No-cGMP Signaling in a CD36- and CD47-Dependent Manner. PLoS ONE 5(12): e15686. doi:10.1371/journal.pone.0015686

**Editor:** Sergio T. Ferreira, Federal University of Rio de Janeiro, Brazil

**Received:** August 9, 2010; **Accepted:** November 21, 2010; **Published:** December 22, 2010

This is an open-access article distributed under the terms of the Creative Commons Public Domain declaration which stipulates that, once placed in the public domain, this work may be freely reproduced, distributed, transmitted, modified, built upon, or otherwise used by anyone for any lawful purpose.

**Funding:** This work was supported by the Intramural Research Program of the National Institutes of Health (NIH), National Cancer Institute, Center for Cancer Research (D.D.R.), NIH grant CA128616 (J.S.I.) and by the Howard Hughes Medical Institute–NIH Research Scholars Program (H.B.S.). The funders had no role in study design, data collection and analysis, decision to publish, or preparation of the manuscript.

**Competing Interests:** The authors have declared that no competing interests exist.

\* E-mail: droberts@helix.nih.gov

## Introduction

The pathogenesis of Alzheimer's disease is closely associated with the accumulation of amyloid- $\beta$  (A $\beta$ ) peptides, which eventually form neuronal deposits known as senile plaques on the outside surface of the neurons [1] and lead to neuron death. A $\beta$  is a peptide of 37–43 amino acids in length that originates by proteolytic cleavage from the amyloid precursor protein, which is a neuronal transmembrane protein that contributes to innate antimicrobial immunity and has unknown function in the CNS [2]. Binding of A $\beta$  to the plasma membrane is thought to be a critical step in development of Alzheimer's disease [3], and the formation of A $\beta$  plaques is a primary trigger of neuron degeneration [4]. However, our molecular understanding of how A $\beta$  contributes to the pathogenesis of Alzheimer's disease remains incomplete [5,6,7].

Nitric oxide (NO) is a cell signaling molecule that plays an important role in regulating vascular, immune, and neurological processes. For example, both hippocampal and cortical long-term potentiation, a physiological correlate of synaptic plasticity thought to underlie learning and memory, involve NO signaling cascades [8,9]. NO can originate from exogenous sources and diffuse across the cell membrane, or it can be synthesized from L-arginine within the cell by nitric oxide synthases (NOS). NO activates soluble guanylate cyclase (sGC) to produce cGMP [10], which activates cGMP-dependent kinase (cGK), a major cellular receptor of cGMP [11]. cGK then catalyzes the phosphorylation of its

substrates, which initiate various cellular responses such as smooth muscle relaxation, delayed platelet aggregation, intestinal secretion, and long term potentiation [12,13,14,15].

NO in the brain can be produced either by inducible NOS (iNOS/NOS2) in microglia and astrocytes, or by constitutive NOS in neurons and endothelial cells (nNOS/NOS1 and eNOS/NOS3). A large body of evidence suggests that the NO produced by neuronal and endothelial constitutive NOS is responsible for neuroprotection during A $\beta$ -induced cell death, while NO production in the case of iNOS activation plays a neurotoxic role due to the inflammatory response caused by the over generation of other reactive nitrogen species from NO (see review [16]). A decrease in neuronal NOS and an increase in hippocampal iNOS have been demonstrated in aged rats [17], thus suggesting the dual roles of NO. In mice, the higher level of constitutive NO produced by iNOS protects beta-amyloid transgenic mice from developing most typical human symptoms of Alzheimer's disease [18]. When crossed into an iNOS-null background these mice displayed extensive tau pathology associated with regions of dense microvascular amyloid deposition.

The protective role of NO in Alzheimer's disease pathogenesis has been linked to NO/sGC/cGMP/cGK signaling cascades. Treatment with NO donors and cGMP analogues suppresses cell death [19], and increasing intracellular cGMP levels prevents inflammatory responses in brain cells [20]. Moreover, the use of the NO donors, sGC stimulators, and cGMP-analogs reverses learning and memory impairment through cGK activation, in part

by reestablishing the enhancement of the transcription factor cAMP-responsive element-binding protein (CREB), which is phosphorylated during long term potentiation [21].

However, an accumulation of A $\beta$  inhibits the NO signaling pathway and therefore may suppress the protective effects of endogenous NO in the brain. Chronic administration of fibrillar A $\beta$  decreases the expression of sGC in cultured rat astrocytes, desensitizing them to treatment with sodium nitroprusside [22]. Acute A $\beta$  administration blocks NO-induced vasoactivity in rats [23,24] and inhibits NO-stimulated phosphorylation of CREB [21]. The molecular mechanisms behind the down regulation of NO signaling by acute A $\beta$  exposure remain a mystery, and are the focus of this paper. Understanding these mechanisms can potentially provide the basis for a novel therapeutic application of drugs aimed at limiting the adverse effects of A $\beta$ .

The well-studied inhibitor of NO-cGMP signaling thrombospondin-1 (TSP1) shares several features with A $\beta$  that suggested a common mechanism to inhibit NO signaling. Among the known cell surface TSP1 receptors, three have been proposed to also interact with A $\beta$ : CD36, CD47, and  $\alpha_6\beta_1$  integrin [25,26]. Although direct binding of A $\beta$  to each of these receptors has not been established, the ability of A $\beta$  to stimulate interleukin-1 $\beta$  release and reactive oxygen species production in microglial cells was inhibited by antibodies to each receptor [26]. Because CD36 and CD47 are each known to associate with some  $\beta_1$  integrins, the authors proposed that A $\beta$  binds to a complex of these 3 receptors. Microglial phagocytosis of A $\beta$  fibrils was subsequently shown to be inhibited by antagonists of the same receptor [27]. A GST-CD36 fusion protein and a CD47-binding peptide inhibited A $\beta$ -stimulated Vav1 phosphorylation in THP-1 monocytes [28]. Furthermore, the ability of A $\beta$  to stimulate histamine release by mast cells was inhibited by antibodies against CD47 and  $\beta_1$  integrin subunit and by a modified TSP1 peptide that binds to CD47 [29]. Contrary to these receptors recognizing A $\beta$  as a complex, phagocytosis of A $\beta$  was enhanced by conditions that increased CD36 but decreased CD47 recruitment to lipid raft domains of microglial cells [30].

TSP1 inhibits NO signaling in vascular cells by binding to CD47 to decrease sGC activity and cGMP levels [25,31,32]. TSP1 binding to CD36 can also inhibit this pathway, but only in cells that also express CD47 [25]. To test whether A $\beta$  suppresses sGC activity and thus inhibits NO signal transduction by the same mechanism as TSP1, we used intracellular cGMP production as an indicator of sGC activity after stimulation by NO. We demonstrate that inhibition of the NO-cGMP signaling pathway by A $\beta$  requires CD47 and CD36 but may not involve a direct interaction of A $\beta$  with CD47. Rather, CD47 signaling may be perturbed downstream of A $\beta$  interacting with CD36.

## Results

### A $\beta$ interacts directly with CD36 but not with CD47

A $\beta$ (1–42) has 3 predominate conformations, monomeric peptide, soluble oligomers, and fibrillar, that depend on the amount of time it is left in solution to aggregate. Controversy still exists as to which of these mediate A $\beta$  pathology, and both the soluble and fibrillar forms are inhibitors of vascular responses [24,33,34,35]. Considering this ambiguity, we compared the ability of fibrillar and soluble peptide forms to interact with CD36 based on their ability to inhibit the fatty acid translocase activity of CD36 [36,37]. Both forms inhibited [ $^3$ H]-myristic acid uptake by both glial and vascular cells in a dose-dependent manner (Fig. 1A–C). While their responses were equipotent in human aortic VSMC and HUVEC (Fig. 1A, B), the soluble peptide was more potent in

microglial cells (Fig. 1C). Based on these results, we used the soluble peptide for the remainder of the studies.

Previous antibody and peptide inhibition studies implicated CD47 in A $\beta$  signaling but did not determine whether A $\beta$  binds directly to CD47 [26,27,28,29]. The prototypical ligand for CD47 is the extracellular domain of its counter-receptor SIRP $\alpha$  [38]. We have previously shown that binding of the CD47 ligand TSP1 can be measured by displacement of labeled SIRP $\alpha$ -Fc fusion protein [39]. We employed the same assay to determine whether A $\beta$  binds directly to CD47 but observed no significant inhibition of SIRP $\alpha$ -Fc binding at A $\beta$  concentrations up to 10  $\mu$ M (Fig. 1D). Therefore, the role of CD47 in mediating the inhibitory activity of A $\beta$  may be indirect, as previously shown for peptide ligands of CD36 that also do not bind to CD47 [39].

Although we cannot exclude the possibility that A $\beta$  indirectly inhibits the translocase activity of CD36, these data support a direct interaction between A $\beta$  and the scavenger receptor CD36 but not with CD47.

### Soluble A $\beta$ inhibits NO and BAY 41-2272 stimulated sGC activity

TSP1 engagement of CD47 or CD36 inhibits activation of sGC in several cell types [25,32,40,41]. To evaluate the effect of A $\beta$  on sGC activation, we tested whether A $\beta$  directly blocks NO-stimulated cGMP production. Treatment of BAEC with 10  $\mu$ M of A $\beta$  led to a slight decrease in the basal levels of cGMP (Fig. 2A). As expected, addition of the fast-releasing NO donor DEA/NO (10  $\mu$ M) caused a significant increase of cGMP production. Cells that were treated with A $\beta$  followed by DEA/NO exhibited lower levels of cGMP than those given only the NO donor, suggesting that A $\beta$  signaling directly blocks sGC activation. The cGMP data represented in Figure 1 were obtained without inclusion of a phosphodiesterase inhibitor such as 3-isobutyl-1-methylxanthine or sildenafil. Thus, the effect of A $\beta$  on cGMP flux could result either from inactivation of sGC or stimulation of phosphodiesterase activity. However, A $\beta$  also inhibited cGMP accumulation in the presence of 3-isobutyl-1-methylxanthine (IBMX, Fig. 2B) establishing that A $\beta$  signaling regulates sGC activation.

We recently reported that TSP1 also inhibits drug-induced activation of sGC [42]. Treatment of Jurkat cells with 10  $\mu$ M of the synthetic sGC activator BAY 41–2272 led to an increase in cGMP production similar to that observed after treatment with DEA/NO (Fig. 2C). The increase intracellular cGMP induced by the BAY compound was inhibited by the addition of 10  $\mu$ M of A $\beta$  peptide. Therefore, A $\beta$  suppresses both NO-induced and synthetic sGC stimulator-mediated sGC activation, reducing cGMP production and inhibiting NO signaling.

The inhibitory effect of A $\beta$  on sGC activation extends to both Jurkat human T lymphoma cells (Fig. 2D) and porcine VSMC (Fig. 2E). A dose response in porcine VSMC revealed an IC<sub>50</sub> value of about 5  $\mu$ M A $\beta$ , while the Jurkat T cells were more sensitive, having an IC<sub>50</sub> of less than 100 nM. A dose of 10  $\mu$ M A $\beta$  was used in subsequent experiments as it caused a greater than 50% inhibition in all three cell types.

TSP1 inhibits NO/cGMP-stimulated VSMC adhesion on collagen [40], and we used this adhesion as a functional assay of the effect of A $\beta$  on cGMP production. Paralleling its inhibition of cGMP production in primary porcine VSMCs (Fig. 2E), A $\beta$  dose dependently inhibited NO (10  $\mu$ M DEA/NO) stimulated adhesion of VSMC to collagen coated wells (Fig. 2F). 10  $\mu$ M A $\beta$  inhibited NO-stimulated VSMC adhesion by 40 $\pm$ 12%.

Thrombin-induced platelet aggregation is potentially delayed by NO-cGMP signaling [43]. Under standard high shear conditions, thrombin induced aggregation of washed human platelets was

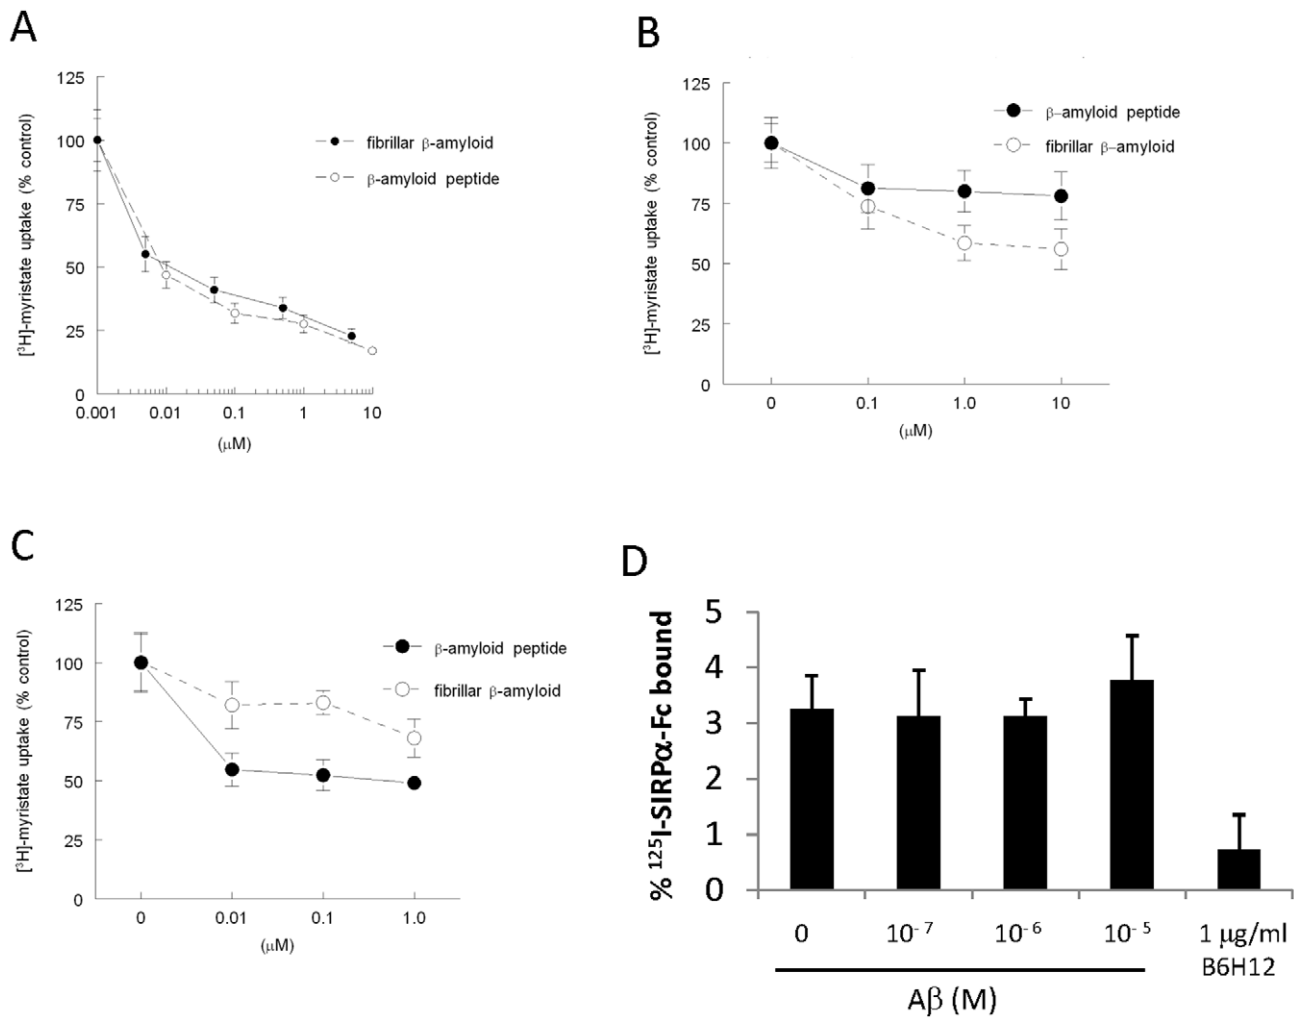

**Figure 1. Fibrillar and soluble A $\beta$  inhibit cellular myristate uptake but not SIRP $\alpha$  binding to CD47.** [ $^3$ H]-Myristic acid uptake after 5 min into human aortic VSMC (A), HUVEC (B), and microglial cells (C) was determined in the presence of the indicated concentrations of A $\beta$  (soluble or fibrillar) after lysis by liquid scintillation counting. D [ $^{125}$ I]-SIRP $\alpha$ -Fc binding to Jurkat T-cells was measured in the presence of soluble A $\beta$  (0.1–10  $\mu$ M) or a CD47-specific function-blocking antibody (B6H12) for 1 hour at 25°C. doi:10.1371/journal.pone.0015686.g001

delayed by the addition of 10 nM DEA/NO (Fig. 2G). This delay was reversed by pre-treating the platelets with 10  $\mu$ M A $\beta$  prior to the addition of 10 nM DEA/NO. The same effect of A $\beta$  was also observed when platelet aggregation was assessed under low shear conditions (data not shown). Thus, consistent with the inhibition of NO and sGC activator induced stimulation of cGMP production, A $\beta$  inhibits at least two functional outcomes of cGMP signaling in cells.

#### A $\beta$ inhibition of NO signaling requires CD36

CD36 has been implicated as a receptor/mediator for other targets of A $\beta$  signaling [26,28]. Data in Figures 1A–C suggest that A $\beta$  directly binds to CD36 based on its inhibiting cellular uptake of the CD36 ligand myristic acid, but we cannot exclude that A $\beta$  inhibits myristate uptake indirectly by binding to another CD36-associated protein. Previous results from our lab have shown that binding of recombinant type 1 repeats of TSP1, a synthetic peptide derived from this domain of TSP1, or a related peptidomimetic to CD36 is sufficient to inhibit both myristate uptake and NO-cGMP signaling [25,32]. To examine whether A $\beta$  inhibition of cGMP signaling requires CD36, BAEC and Jurkat

cells were pretreated with a splice-blocking CD36 morpholino oligonucleotide. In both cell types this knockdown resulted in decreased A $\beta$  inhibition of NO induced cGMP accumulation (Fig. 3A, B). Nearly complete reversal of A $\beta$  inhibition occurred when CD36 expression was suppressed in HUVEC. Therefore, unlike the inhibitory activity of TSP1, CD36 expression is necessary for A $\beta$  to inhibit sGC activation in these cells.

#### A $\beta$ inhibition of NO signaling also requires CD47

Although ligation of CD36 is sufficient to inhibit cGMP signaling, this inhibition is lost in cells lacking CD47 [25]. Therefore, CD47 is necessary for CD36-mediated inhibition of cGMP signaling. In contrast, TSP1 inhibition of cGMP signaling via of its high affinity binding to CD47 does not require CD36 [39]. This suggests that modulation of cGMP signaling by CD36 ligands is mediated by cross-talk with CD47. Consistent with the BAEC data described above, wild-type murine vascular cells expressing CD47 and treated with 10  $\mu$ M DEA/NO showed a 4-fold increase in intracellular cGMP production that was inhibited by the addition of A $\beta$  (Fig. 4A). In contrast, A $\beta$  failed to suppress the increase in the cGMP production induced by

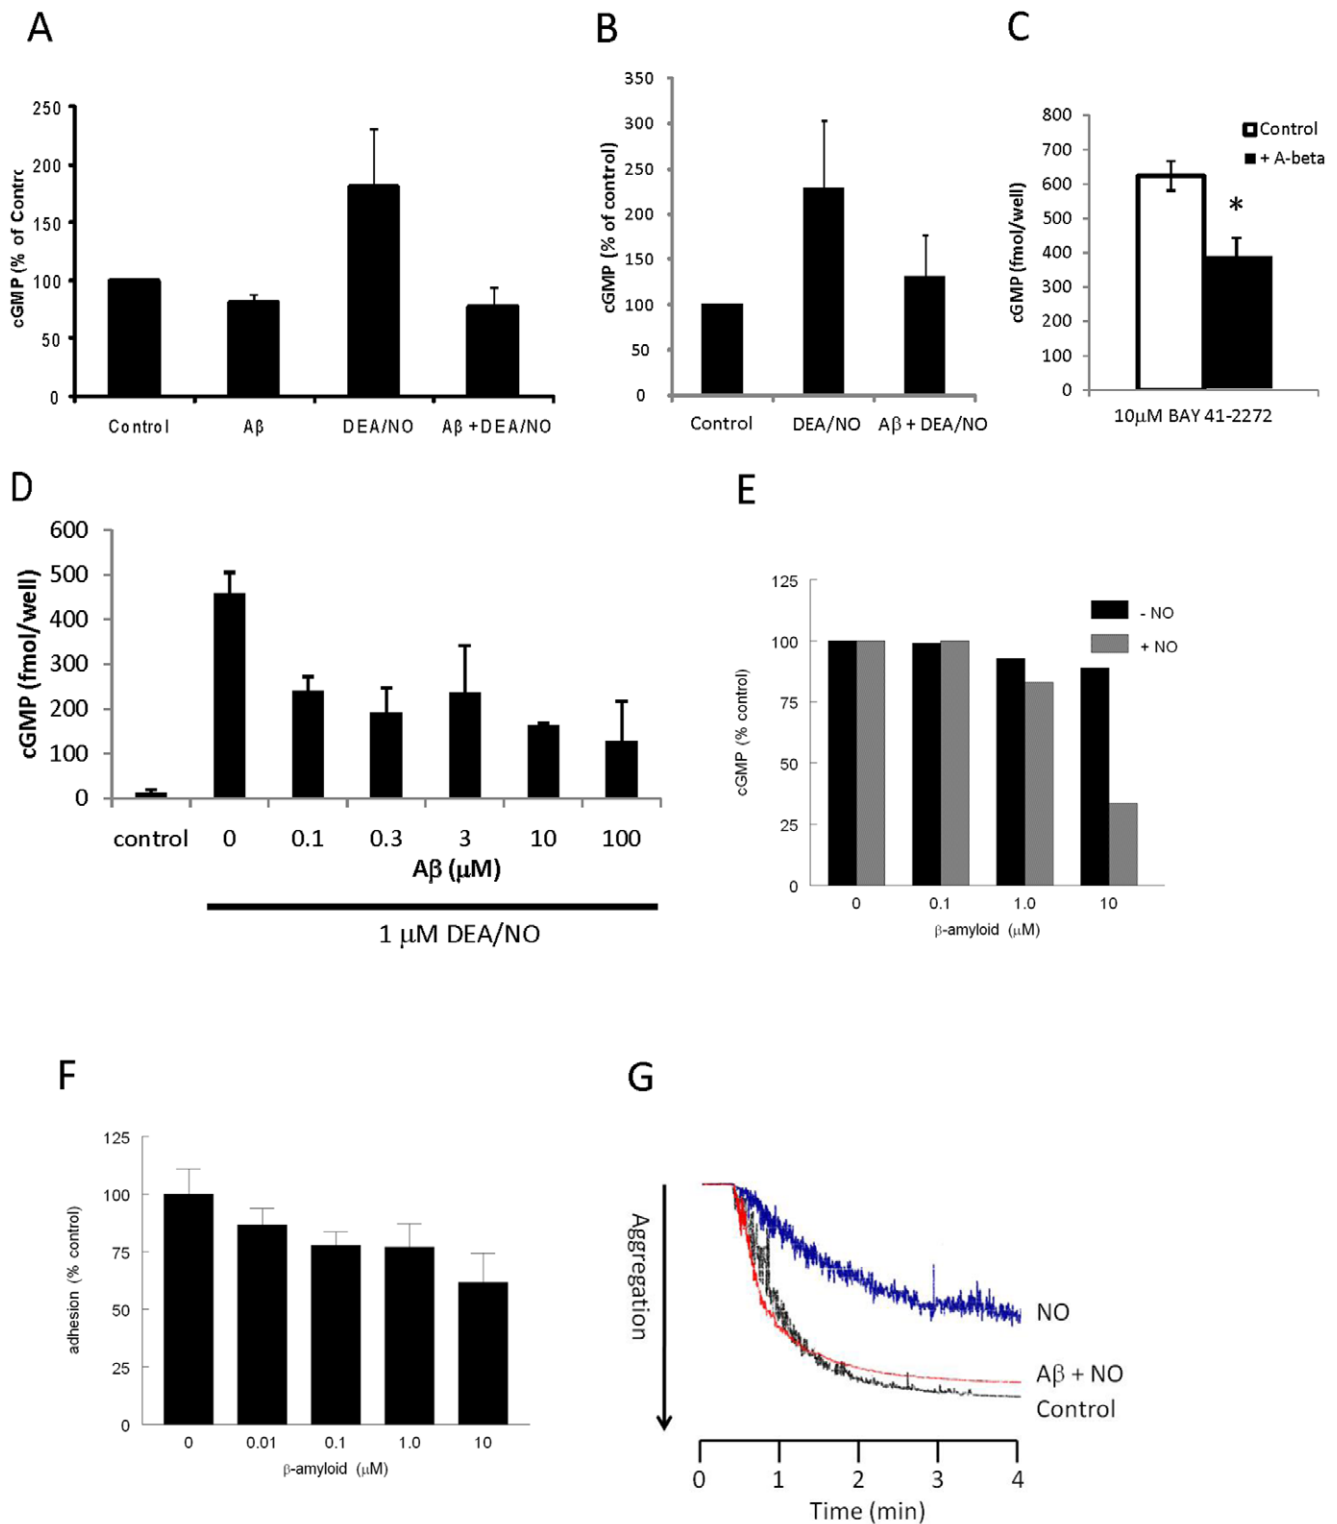

**Figure 2. A $\beta$  inhibits NO-induced cGMP synthesis and function.** **A** BAEC were pretreated with 10  $\mu$ M A $\beta$  followed by 10  $\mu$ M DEA/NO. **B** HUVEC were pretreated with 10  $\mu$ M A $\beta$  followed by 90  $\mu$ M IBMX and 10  $\mu$ M DEA/NO. **C** Jurkat cells were pretreated with 10  $\mu$ M A $\beta$  followed by an NO-independent sGC activator (BAY 41-2272). **D** Jurkat cells were pretreated with A $\beta$  (0.1–100  $\mu$ M) followed by 1  $\mu$ M DEA/NO. **E** Porcine VSMC were pretreated with A $\beta$  (0.1–10  $\mu$ M) followed by 10  $\mu$ M DEA/NO. Following treatment, cells were lysed and assayed for cGMP production.  $n = 3$ , \* denotes  $P < 0.05$ . **F** Porcine VSMC adhesion to collagen coated wells was assessed in the presence of A $\beta$  (0.01–10  $\mu$ M) for 1 hour. **G** Thrombin (0.2 U)-induced aggregation of washed human platelets was assessed in the absence (control) or presence of DEA/NO (0.01  $\mu$ M) and with a 5 min pretreatment of A $\beta$  (10  $\mu$ M) followed by DEA/NO.

doi:10.1371/journal.pone.0015686.g002

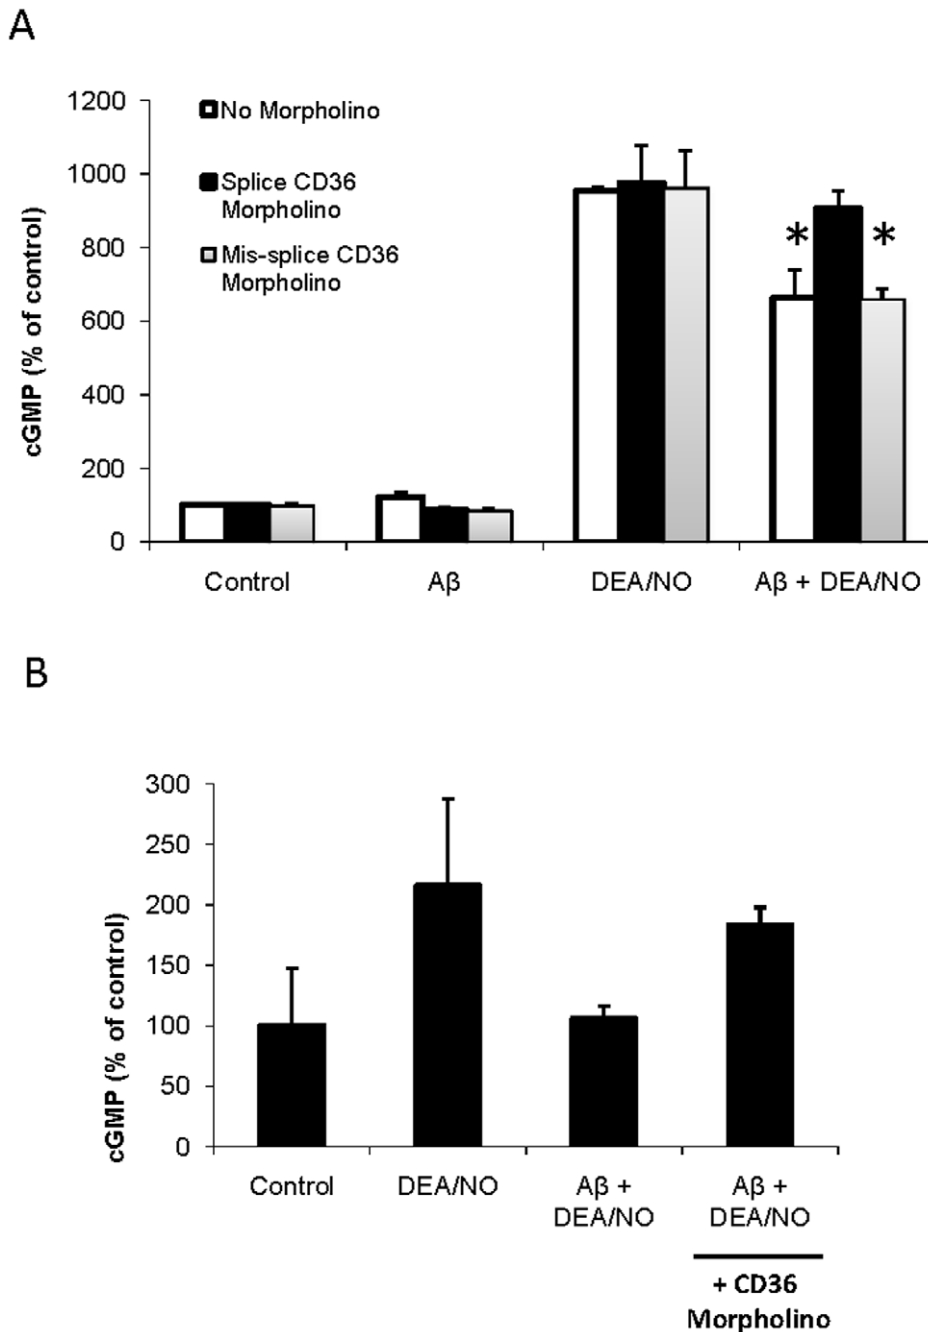

**Figure 3. A $\beta$  inhibition of NO signaling is dependent on CD36.** **A** Jurkat cells or **B** BAEC were incubated with 10  $\mu$ M CD36 antisense morpholino or 10  $\mu$ M 5-mis-splice CD36 control morpholino for 48 hrs. Following CD36 knockdown, cells were pretreated with 10  $\mu$ M A $\beta$  followed by 10  $\mu$ M DEA/NO. Following treatment, cells were lysed and assayed for cGMP production.  $n = 3$ , \* denotes  $P < 0.05$ . doi:10.1371/journal.pone.0015686.g003

DEA/NO in murine CD47 $^{-/-}$  lung endothelial cells. Conversely, suppressing CD47 expression in Jurkat T-cells using a CD47-specific morpholino abolished the effect of A $\beta$  on NO-stimulated cGMP accumulation (Fig. 4B). Thus, two independent approaches confirm that CD47 is necessary for A $\beta$  to suppress NO signaling.

#### A $\beta$ inhibition of NO signaling is TSP1 independent

TSP1 is known to inhibit NO signaling by suppressing sGC activity through CD47, in the same manner through which we

observed A $\beta$  to inhibit NO signaling. To rule out the possibility that the observed A $\beta$  inhibitory activity is due to or influenced by mobilization of endogenous TSP1, we used TSP1 null cells to evaluate A $\beta$  inhibition of NO signaling. As shown in Figure 5, in wild type primary murine lung endothelial cells bearing TSP1, the addition of DEA/NO increased intracellular cGMP production, while treatment with A $\beta$  inhibited DEA/NO stimulated cGMP production, as expected. In the corresponding TSP1 null cells, a similar pattern was observed in which A $\beta$  inhibited an increase in cGMP levels caused by DEA/NO and thus inhibited sGC activity.

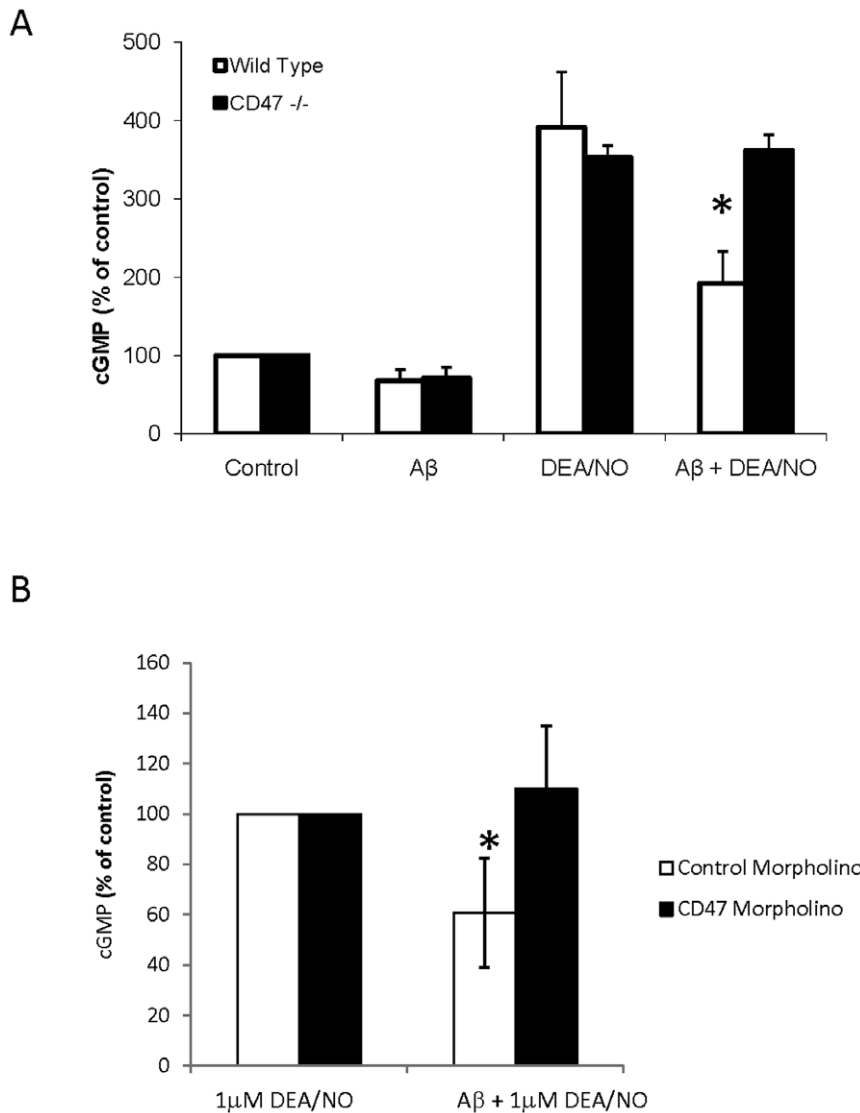

**Figure 4. A $\beta$  inhibition of NO signaling is dependent on CD47.** **A** Wild type or CD47<sup>-/-</sup> primary murine lung endothelial cells were pretreated with 10  $\mu$ M A $\beta$  followed by 10  $\mu$ M DEA/NO. **B** Wild type Jurkat cells were incubated with 10  $\mu$ M CD47 antisense morpholino or 10  $\mu$ M of a 5 base mismatched CD47 control morpholino for 48 hrs. Following CD47 knockdown, cells were pretreated with 10  $\mu$ M A $\beta$  followed by 1  $\mu$ M DEA/NO. Following treatment, cell were lysed and assayed for cGMP production.  $n = 3$ , \* denotes  $P < 0.05$ . doi:10.1371/journal.pone.0015686.g004

Therefore, A $\beta$  inhibition of NO signaling is not an artifact of modulating endogenous TSP1.

## Discussion

Although previous studies have suggested that A $\beta$  is involved in the inhibition of NO-induced processes such as hippocampal long term potentiation [21], vascular tone [23], and CREB phosphorylation (18), the molecular mechanism through which inhibition of NO signaling occurs was not defined. Identifying how A $\beta$  is able to suppress the NO signaling pathway is important in the development of therapeutics aimed at slowing Alzheimer's disease pathogenesis because enhancing neuronal NO has the potential to protect against neurodegeneration. Here, we provide evidence that A $\beta$  inhibits the NO signaling pathways through its interactions with CD36, which causes a CD47-dependent decrease in sGC activity and cGMP production. This inhibition was reproduced in VSMC, endothelial cells, and T cells and prevents both NO- and

drug-mediated activation of sGC. We also showed that A $\beta$  can inhibit uptake of free fatty acids via CD36, which was previously established to regulate NO synthesis in vascular cells [37,44].

The activity of A $\beta$  to inhibit NO/cGMP signaling in vascular and T cells suggests that pathological accumulation of A $\beta$  can play a key role in limiting the NO signaling pathway (7). Previously, various downstream targets of NO have been shown to be inhibited by A $\beta$  (18, 19). Here, we provide a link between A $\beta$  and NO signaling by showing that all the downstream inhibitory responses could result from suppression of sGC activity by A $\beta$  (Figure 6). We further report that A $\beta$  offsets increases in cGMP levels caused by both NO donors and synthetic sGC activators, indicating that A $\beta$  can inhibit sGC independent of its NO-binding heme prosthetic group. This is important because others have shown that sGC can be inhibited by oxidizing the Fe<sup>2+</sup> in this heme.

Our results further show that decreased sGC activity and NO signaling caused by A $\beta$  are dependent on the presence of CD47. Previously, A $\beta$  fibrils were proposed to attach to microglial cells by

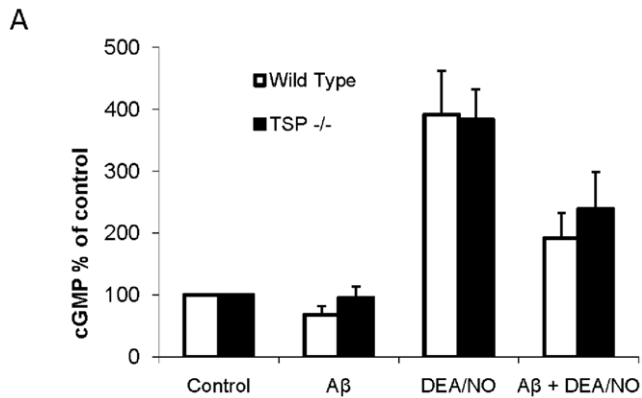

**Figure 5. A $\beta$  inhibition of NO signaling is not dependent on TSP1.** A Wild type or TSP1<sup>-/-</sup> primary murine lung endothelial cells were pretreated with 10  $\mu$ M A $\beta$  followed by 10  $\mu$ M DEA/NO. Following treatment, cells were lysed and assayed for cGMP production. n=3, \* denotes P<0.05. doi:10.1371/journal.pone.0015686.g005

interacting with a cell surface receptor complex that includes CD47,  $\alpha_6\beta_1$  integrin, and CD36 [3]. While the evidence for functional involvement of CD36 in A $\beta$  signaling was strong, the evidence for CD47 binding was only inferred based on sensitivity to 4N1K, a thrombospondin-1-based peptide with both CD47-dependent and CD47-independent activities [45,46]. The ability of A $\beta$  to directly interact with integrins is also controversial. An Arg-His-Asp sequence in A $\beta$  was shown to be recognized by  $\alpha_5\beta_1$  integrin and mediate its uptake and degradation [47]. However, another study concluded that integrin antagonists increase uptake of A $\beta$  and increase its neurotoxicity in brain tissue [48]. Beta-2 integrins have also been identified as A $\beta$  receptors [49], and  $\alpha_2\beta_1$  and  $\alpha_v\beta_1$  were implicated in fibrillar amyloid deposition [50]. Therefore, it is unlikely that  $\alpha_6\beta_1$  is a specific integrin receptor for A $\beta$  that could account for its inhibition of NO signaling.

We propose a revised version of the A $\beta$  binding model presented by Bamberger *et al.* A $\beta$  inhibition of cGMP-dependent signaling requires CD47, but A $\beta$  binding may depend more on the interaction with the scavenger receptor CD36, which is well

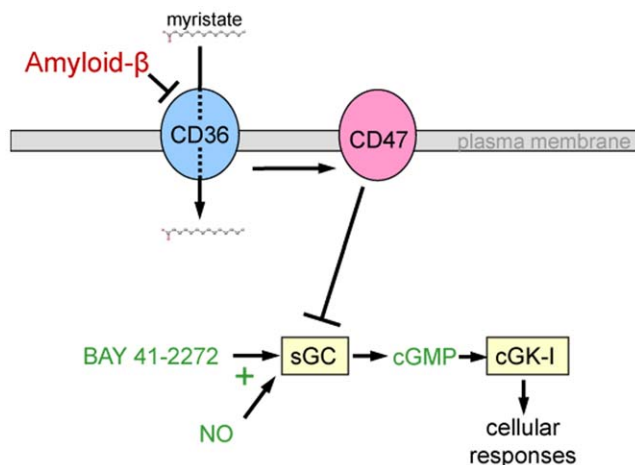

**Figure 6. Proposed model of A $\beta$  inhibition of cGMP production.** A $\beta$  binds directly to CD36 to inhibit uptake of free fatty acids. In the presence of CD47, CD36 engagement transduces an inhibitory signal to sGC, limiting its activation and production of cGMP. doi:10.1371/journal.pone.0015686.g006

known for its promiscuous binding to a variety of extracellular ligands (reviewed in [51]). Binding of A $\beta$  to CD36 or to an associated molecule generates an inhibitory signal that is probably transduced via CD47 (Figure 6). This model is consistent with the requirement for both CD36 and CD47 and the inability of A $\beta$  to displace SIRP $\alpha$ , a specific CD47 ligand. CD47 also plays a role in A $\beta$  inhibition of kinase-based signal transduction cascades [26] and Vav1 activation [28], but like inhibition of sGC activation, these responses may be independent of direct binding between A $\beta$  and CD47.

A $\beta$  regulation of NO signaling through CD47 differs slightly from TSP1 inhibition of NO signaling in vascular cells [25]. CD47 is a high affinity receptor for TSP1, and this binding inhibits NO signaling by suppression of sGC activation and a decrease in cGMP levels [20, 22]. In contrast, A $\beta$  does not interact directly with CD47. TSP1 can also bind to CD36, but the affinity of this interaction is lower. Thus, CD47 is the dominant signaling receptor for physiological concentrations of TSP1. A $\beta$  appears to not bind to CD47, but CD47 is necessary for A $\beta$ 's inhibition of sGC activation. The details of how CD47 contributes to CD36-mediated A $\beta$  signaling to decrease sGC activation remain to be defined.

Recognizing that A $\beta$  inhibits NO signaling by suppressing sGC activity through CD36 and CD47 may clarify A $\beta$ 's role in Alzheimer's disease pathogenesis and could lead to novel therapeutics aimed at limiting the adverse effects of A $\beta$  in the brain. As mentioned previously, NO can protect against neuron degeneration and inflammation, but its signaling is inhibited by A $\beta$  at the level of sGC activation. Thus, elevating the steady state NO levels would be more effective in combination with an agent targeting CD47 to relieve the block at sGC. Realizing that this inhibition occurs through CD47 and CD36, therapeutic approaches could be developed to block A $\beta$  signaling through these receptors to rescue the NO signaling pathway.

In addition to providing a mechanistic basis for the recognized deficiencies in NO/cGMP signaling associated with Alzheimer's disease pathogenesis, our data may have implications for peripheral vascular disease in light of the documented A $\beta$  accumulation in diseased peripheral as well as cerebral blood vessels. Consistent with the inhibitory activities of A $\beta$  we describe using large vessel endothelial and VSMC, A $\beta$  was previously shown to inhibit vascular reactivity in isolated rabbit and rat aorta [33,52]. Furthermore, the secretion of A $\beta$  by activated platelets during aging and hypercholesterolemia may expose the peripheral vasculature to this NO antagonist and account for part of the NO insufficiency and insensitivity of these diseases [53,54].

Mutations resulting in CD36 deficiency occur in humans and some strains of spontaneously hypertensive rats. Humans with CD36 deficiency exhibit hyperlipidemia, increased remnant lipoproteins, impaired glucose metabolism based upon insulin resistance, and mild hypertension [55]. Based on our observation that A $\beta$  impairs the fatty acid translocase activity of CD36, the accumulation of vascular-associated A $\beta$  in Alzheimer's disease could cause a local functional CD36 deficiency by blocking lipid and, potentially, oxidized lipoprotein uptake via this receptor. In addition to perturbing vascular NO signaling via CD36, this direct effect of A $\beta$  on CD36 translocase function merits further study.

## Materials and Methods

### Cells and reagents

Bovine aortic endothelial cells (BAECs) prepared from fresh aortic segments [56] and human umbilical vein endothelial cells (HUVEC) obtained from Lonza (Walkersville, MD) were cultured

in endothelial growth medium (EGM; Lonza, Walkersville, MD) in 5% CO<sub>2</sub> at 37°C, and were used at passages 3–8. Jurkat human T-lymphoma cells[57] were cultured in RPMI 1640 (Invitrogen) with 10% FBS, glutamine, and penicillin/streptomycin. Cells were kept at a density of between  $1 \times 10^5$  and  $5 \times 10^5$  and used between passages 7 and 20. Primary mouse endothelial cells were obtained from the lungs of wild-type, TSP1-null, and CD47-null C57BL/6 mice after sacrifice[39], and grown in EGM as above. BV2 immortalized murine microglial cells[58] (a gift of Dr. Sandra Rempel, Hermelin Brain Tumor Center, Henry Ford Health System, Detroit, MI) were maintained in DMEM (Invitrogen) with 10% FBS, glutamine, and penicillin/streptomycin. Porcine vascular smooth muscle cells (white hairless Yucatan miniature pig, as described in [59]) and human aortic vascular smooth muscle cells (VSMC, Lonza) were cultured in SMGM2 (Lonza; Walkersville, MD) and were used at passages 3–8. DEA/NO was provided by Dr. Larry Keefer (NCI, Frederick, MD). BAY 41–2272 and IBMX (3-isobutyl-1-methylxanthine) were obtained from Calbiochem (La Jolla, CA). A $\beta$ (1–42) peptides were purchased from Anaspec (San Jose, CA). Fibrillar A $\beta$  was made by incubating peptides in sterile distilled water for 1 week at 37°C. Extracellular domain of SIRP $\alpha$  fused to a modified human Fc domain was prepared and labeled with <sup>125</sup>I as previously described [39,60]. Anti-CD47 antibody B6H12 was purchased from Abcam (Cambridge, UK). Care and handling of animals was in accordance with and approved by Animal Care and Use Committees of the National Cancer Institute (Protocol LP-012).

### Intracellular cGMP assay

BAEC, porcine VSMC, or mouse primary cells were plated in 6-well plates. The cells were grown in serum containing media until reaching 80% confluence, at which time they were serum starved overnight in endothelial basal medium (EBM; Lonza) or smooth muscle basal medium (SMBM; Lonza) with 0.1% bovine serum albumin (BSA; Sigma-Aldrich, St Louis, MO). Jurkat cells were assayed at  $5 \times 10^5$  cells per condition in 0.5 ml basal media (RPMI, glutamine, penicillin/streptomycin, 0.01% BSA). The relevant cells were pre-incubated for 15 min with the indicated concentrations of A $\beta$  and then treated with DEA/NO for 2 min at room temperature. The cells were then lysed, and total intracellular cGMP levels were measured via immunoassay using a cGMP kit (GE/Amersham Healthcare, Amersham, United Kingdom) according to the manufacturer's instructions. A  $\mu$ BCA protein assay (Thermo Scientific, Rockford, IL) was performed to determine the protein concentration for each of the samples. cGMP levels were normalized based on the amount of protein present.

Experiments using BAY 41–2272 followed the same above procedure, except 10  $\mu$ M of BAY 41–2272 in DMSO was used instead of DEA/NO. In the experiments involving BAY 41–2272, dimethyl sulfoxide (DMSO; Sigma) was also added to control wells.

### [<sup>3</sup>H]-myristate uptake assay

The [<sup>3</sup>H]myristic acid uptake assays were performed using 80–90% confluent HUVEC, human microglial, and human aortic VSMC cells ( $5 \times 10^5$  cells/well) in 24-well culture plates (Nunc, Denmark). Trace amounts of [<sup>3</sup>H]myristic acid (5  $\mu$ Ci/ml, 0.9  $\mu$ M) mixed with 9.1  $\mu$ M nonradioactive myristic acid were dissolved in a FAF BSA solution at a myristic acid/BSA molar ratio of 1:2. Cells were incubated in medium with treatment agents for the indicated time intervals at 37°C. The uptake was stopped by removal of the solution followed by the addition of chilled 0.9% NaCl with 0.5% BSA. The stop solution was discharged, and the cells were washed again with stop solution. Cells were lysed by

adding 0.2 M NaOH (200  $\mu$ l/well) and incubated for 2 h at 37°C. On completion of solubilization, 0.2 M HCl in 1.5 M Tris-HCl (200  $\mu$ l) was added to each well. Radioactivity was determined in 10 ml of Ecoscint A (National Diagnostics, Atlanta, GA) using a 1900CA liquid scintillation counter (Packard Instrument Co.).

### <sup>125</sup>I-SIRP $\alpha$ -Fc binding assay

$1 \times 10^6$  Jurkat T-cells in PBS with cations and 0.1% BSA were incubated with 0.4  $\mu$ g/ml <sup>125</sup>I-SIRP $\alpha$  and the indicated concentrations of A $\beta$  peptide or CD47-specific monoclonal antibody (B6H12) shaking at 25°C for 1 hour. Cells were separated from unbound <sup>125</sup>I-SIRP $\alpha$  by centrifugation through silicone oil (nyosil M25, Nye Co, New Bedford, MA). Cell-bound radioactivity was quantified using a PerkinElmer Life Sciences gamma counter. Data are represented as percent of total counts (no cells), n = 3.

### VSMC adhesion assay

Cell adhesion was carried out in 96-well plates (Nunc, Denmark). After precoating wells with type I collagen (3  $\mu$ g/ml), porcine VSMC were plated at a density of  $1 \times 10^4$  cells/well in SMBM containing 0.1% BSA and treatment agents and incubated in 5% CO<sub>2</sub> for 1 h. Wells were washed with PBS, and the cells were fixed with 1% glutaraldehyde for 10 min, washed, and stained with 1% crystal violet for 20 min. Excess stain was rinsed away, the cells were extracted with 10% acetic acid, and the plates were read at 570 nm.

### Preparation of human platelets

Platelets were obtained as byproducts from healthy volunteers through the NIH department of transfusion medicine blood bank. “Byproducts” of transfusion donations are provided anonymously, without any identifying code or number. The link between the donor and the product is irreversibly destroyed by the DTM. As such, distribution of these products is exempt from the need for IRB approval. Platelets were pelleted from platelet-rich plasma by centrifugation for 10 min at 200 g. They were then resuspended in acid citrate dextrose (ACD; 85 mM citric acid, 65 mM sodium citrate, 100 mM glucose, pH 5.1) at a ratio of 1:10 at room temperature. Platelets were pelleted again and resuspended in 10 ml of Tyrode buffer (137 mM NaCl, 3 mM KCl, 12 mM NaHCO<sub>3</sub>, 0.3 mM NaHPO<sub>4</sub>, 2 mM CaCl<sub>2</sub>, 1 mM MgCl<sub>2</sub>, 5.5 mM glucose, 5 mM N-2-hydroxyethylpiperazine- N-2-ethanesulphonic acid (HEPES), 3.5 mg/ml BSA, pH 7.4). The final platelet number was adjusted to  $6.5 \times 10^5$  platelets/ml in a cuvette containing 500  $\mu$ l of Tyrode buffer.

### Platelet aggregation assay

Aggregation of human platelets under high shear conditions was assessed using a standard optical aggregometer (Lumi-Dual Aggregometer; Chrono-Log, Havertown, PA, USA) at 37°C and 1200 rpm in a volume of 500  $\mu$ l buffer with a final platelet concentration of  $6.5 \times 10^5$  platelets/ml over a 5 min interval. Preincubation with A $\beta$  (10  $\mu$ M) was for 5 min prior to addition of DEA/NO (0.01  $\mu$ M) or vehicle control, which were incubated 5 min prior to the initiation of aggregation with thrombin (0.2 U).

### Statistical analysis

All assays were repeated at least in triplicate and some are normalized to percents of control in order to account for the differences in cell count and conditions between trials. The results were expressed as means  $\pm$  SD or shown as representative data. Statistical significance was determined by the Student t test. A *P*-value less than 0.05 was regarded as statistically significant.



## Acknowledgments

We thank L. Keefer for providing reagents.

## References

- Selkoe DJ (1994) Normal and abnormal biology of the beta-amyloid precursor protein. *Annu Rev Neurosci* 17: 489–517.
- Selkoe DJ (2002) Alzheimer's disease is a synaptic failure. *Science* 298: 789–791.
- Verdier Y, Zarandi M, Penke B (2004) Amyloid beta-peptide interactions with neuronal and glial cell plasma membrane: binding sites and implications for Alzheimer's disease. *J Pept Sci* 10: 229–248.
- Van Broeck B, Van Broeckhoven C, Kumar-Singh S (2007) Current insights into molecular mechanisms of Alzheimer disease and their implications for therapeutic approaches. *Neurodegener Dis* 4: 349–365.
- Castellani RJ, Lee HG, Siedlak SL, Nunomura A, Hayashi T, et al. (2009) Reexamining Alzheimer's disease: evidence for a protective role for amyloid-beta protein precursor and amyloid-beta. *J Alzheimers Dis* 18: 447–452.
- Hardy J (2009) The amyloid hypothesis for Alzheimer's disease: a critical reappraisal. *J Neurochem* 110: 1129–1134.
- Pimplikar SW (2009) Reassessing the amyloid cascade hypothesis of Alzheimer's disease. *Int J Biochem Cell Biol* 41: 1261–1268.
- Arancio O, Kiebler M, Lee CJ, Lev-Ram V, Tsien RY, et al. (1996) Nitric oxide acts directly in the presynaptic neuron to produce long-term potentiation in cultured hippocampal neurons. *Cell* 87: 1025–1035.
- Bon CL, Garthwaite J (2003) On the role of nitric oxide in hippocampal long-term potentiation. *J Neurosci* 23: 1941–1948.
- Garthwaite J, Boulton CL (1995) Nitric oxide signaling in the central nervous system. *Annu Rev Physiol* 57: 683–706.
- Lohmann SM, Vaandrager AB, Smolenski A, Walter U, De Jonge HR (1997) Distinct and specific functions of cGMP-dependent protein kinases. *Trends Biochem Sci* 22: 307–312.
- Gruetter CA, Gruetter DY, Lyon JE, Kadowitz PJ, Ignarro LJ (1981) Relationship between cyclic guanosine 3',5'-monophosphate formation and relaxation of coronary arterial smooth muscle by glyceryl trinitrate, nitroprusside, nitrite and nitric oxide: effects of methylene blue and methemoglobin. *J Pharmacol Exp Ther* 219: 181–186.
- Ignarro LJ, Harbison RG, Wood KS, Kadowitz PJ (1986) Activation of purified soluble guanylate cyclase by endothelium-derived relaxing factor from intrapulmonary artery and vein: stimulation by acetylcholine, bradykinin and arachidonic acid. *J Pharmacol Exp Ther* 237: 893–900.
- Ignarro LJ, Buga GM, Wood KS, Byrns RE, Chaudhuri G (1987) Endothelium-derived relaxing factor produced and released from artery and vein is nitric oxide. *Proc Natl Acad Sci U S A* 84: 9265–9269.
- Lu YF, Kandel ER, Hawkins RD (1999) Nitric oxide signaling contributes to late-phase LTP and CREB phosphorylation in the hippocampus. *J Neurosci* 19: 10250–10261.
- Puzzo D, Palmeri A, Arancio O (2006) Involvement of the nitric oxide pathway in synaptic dysfunction following amyloid elevation in Alzheimer's disease. *Rev Neurosci* 17: 497–523.
- Law A, O'Donnell J, Gauthier S, Quirion R (2002) Neuronal and inducible nitric oxide synthase expressions and activities in the hippocampi and cortices of young adult, aged cognitively unimpaired, and impaired Long-Evans rats. *Neuroscience* 112: 267–275.
- Wilcock DM, Lewis MR, Van Nostrand WE, Davis J, Previti ML, et al. (2008) Progression of amyloid pathology to Alzheimer's disease pathology in an amyloid precursor protein transgenic mouse model by removal of nitric oxide synthase 2. *J Neurosci* 28: 1537–1545.
- Wirtz-Brugger F, Giovanni A (2000) Guanosine 3',5'-cyclic monophosphate mediated inhibition of cell death induced by nerve growth factor withdrawal and beta-amyloid: protective effects of propentofylline. *Neuroscience* 99: 737–750.
- Paris D, Town T, Parker T, Humphrey J, Mullan M (2000) beta-Amyloid vasoactivity and proinflammation in microglia can be blocked by cGMP-elevating agents. *Ann N Y Acad Sci* 903: 446–450.
- Puzzo D, Vitolo O, Trinchese F, Jacob JP, Palmeri A, et al. (2005) Amyloid-beta peptide inhibits activation of the nitric oxide/cGMP/cAMP-responsive element-binding protein pathway during hippocampal synaptic plasticity. *J Neurosci* 25: 6887–6897.
- Baltrons MA, Pedraza CE, Heneka MT, Garcia A (2002) Beta-amyloid peptides decrease soluble guanylyl cyclase expression in astroglial cells. *Neurobiol Dis* 10: 139–149.
- Paris D, Town T, Parker TA, Tan J, Humphrey J, et al. (1999) Inhibition of Alzheimer's beta-amyloid induced vasoactivity and proinflammatory response in microglia by a cGMP-dependent mechanism. *Exp Neurol* 157: 211–221.
- Price JM, Chi X, Hellermann G, Sutton ET (2001) Physiological levels of beta-amyloid induce cerebral vessel dysfunction and reduce endothelial nitric oxide production. *Neuro Res* 23: 506–512.
- Isenberg JS, Ridnour LA, Dimitry J, Frazier WA, Wink DA, et al. (2006) CD47 is necessary for inhibition of nitric oxide-stimulated vascular cell responses by thrombospondin-1. *J Biol Chem* 281: 26069–26080.

## Author Contributions

Conceived and designed the experiments: TWM JSI HBS YW DDR. Performed the experiments: TWM JSI HBS YW. Analyzed the data: TWM JSI HBS YW DDR. Wrote the paper: TWM JSI HBS YW DDR.

- Bamberger ME, Harris ME, McDonald DR, Husemann J, Landreth GE (2003) A cell surface receptor complex for fibrillar beta-amyloid mediates microglial activation. *J Neurosci* 23: 2665–2674.
- Koenigsnecht J, Landreth G (2004) Microglial phagocytosis of fibrillar beta-amyloid through a beta1 integrin-dependent mechanism. *J Neurosci* 24: 9838–9846.
- Wilkinson B, Koenigsnecht-Talbot J, Grommes C, Lee CY, Landreth G (2006) Fibrillar beta-amyloid-stimulated intracellular signaling cascades require Vav for induction of respiratory burst and phagocytosis in monocytes and microglia. *J Biol Chem* 281: 20842–20850.
- Niederhoffer N, Levy R, Sick E, Andre P, Coupin G, et al. (2009) Amyloid beta peptides trigger CD47-dependent mast cell secretory and phagocytic responses. *Int J Immunopathol Pharmacol* 22: 473–483.
- Persaud-Sawin DA, Banach L, Harry GJ (2009) Raft aggregation with specific receptor recruitment is required for microglial phagocytosis of Abeta42. *Glia* 57: 320–335.
- Isenberg JS, Hyodo F, Matsumoto K, Romeo MJ, Abu-Asab M, et al. (2007) Thrombospondin-1 limits ischemic tissue survival by inhibiting nitric oxide-mediated vascular smooth muscle relaxation. *Blood* 109: 1945–1952.
- Isenberg JS, Ridnour LA, Perruccio EM, Espey MG, Wink DA, et al. (2005) Thrombospondin-1 inhibits endothelial cell responses to nitric oxide in a cGMP-dependent manner. *Proc Natl Acad Sci U S A* 102: 13141–13146.
- Smith CC, Stanyer L, Betteridge DJ, Cooper MB (2007) Native and oxidized low-density lipoproteins modulate the vasoactive actions of soluble beta-amyloid peptides in rat aorta. *Clin Sci (Lond)* 113: 427–434.
- Niwa K, Porter VA, Kazama K, Cornfield D, Carlson GA, et al. (2001) A beta-peptides enhance vasoconstriction in cerebral circulation. *Am J Physiol Heart Circ Physiol* 281: H2417–2424.
- Crawford F, Soto C, Suo Z, Fang C, Parker T, et al. (1998) Alzheimer's beta-amyloid vasoactivity: identification of a novel beta-amyloid conformational intermediate. *FEBS Lett* 436: 445–448.
- Febbraio M, Hajjar DP, Silverstein RL (2001) CD36: a class B scavenger receptor involved in angiogenesis, atherosclerosis, inflammation, and lipid metabolism. *J Clin Invest* 108: 785–791.
- Isenberg JS, Jia Y, Fukuyama J, Switzer CH, Wink DA, et al. (2007) Thrombospondin-1 inhibits nitric oxide signaling via CD36 by inhibiting myristic acid uptake. *J Biol Chem* 282: 15404–15415.
- Matozaki T, Murata Y, Okazawa H, Ohnishi H (2009) Functions and molecular mechanisms of the CD47-SIRPalpha signalling pathway. *Trends Cell Biol* 19: 72–80.
- Isenberg JS, Annis DS, Pendrak ML, Ptaszynska M, Frazier WA, et al. (2009) Differential interactions of thrombospondin-1, -2, and -4 with CD47 and effects on cGMP signaling and ischemic injury responses. *J Biol Chem* 284: 1116–1125.
- Isenberg JS, Wink DA, Roberts DD (2006) Thrombospondin-1 antagonizes nitric oxide-stimulated vascular smooth muscle cell responses. *Cardiovasc Res* 71: 785–793.
- Isenberg JS, Romeo MJ, Yu C, Yu CK, Nghiem K, et al. (2008) Thrombospondin-1 stimulates platelet aggregation by blocking the antithrombotic activity of nitric oxide/cGMP signaling. *Blood* 111: 613–623.
- Miller TW, Isenberg JS, Roberts DD (2010) Thrombospondin-1 is an inhibitor of pharmacological activation of soluble guanylate cyclase. *Br J Pharmacol* 159: 1542–1547.
- Mellion BT, Ignarro LJ, Ohlstein EH, Pontecorvo EG, Hyman AL, et al. (1981) Evidence for the inhibitory role of guanosine 3', 5'-monophosphate in ADP-induced human platelet aggregation in the presence of nitric oxide and related vasodilators. *Blood* 57: 946–955.
- Zhu W, Smart EJ (2005) Myristic acid stimulates endothelial nitric-oxide synthase in a CD36- and an AMP kinase-dependent manner. *J Biol Chem* 280: 29543–29550.
- Barazi HO, Li Z, Cashel JA, Krutzsch HC, Annis DS, et al. (2002) Regulation of integrin function by CD47 ligands. Differential effects on alpha v beta 3 and alpha 4 beta 1 integrin-mediated adhesion. *J Biol Chem* 277: 42859–42866.
- Tulasne D, Judd BA, Johansen M, Asazuma N, Best D, et al. (2001) C-terminal peptide of thrombospondin-1 induces platelet aggregation through the Fc receptor gamma-chain-associated signaling pathway and by agglutination. *Blood* 98: 3346–3352.
- Matter ML, Zhang Z, Nordstedt C, Ruoslahti E (1998) The alpha5beta1 integrin mediates elimination of amyloid-beta peptide and protects against apoptosis. *J Cell Biol* 141: 1019–1030.
- Bi X, Gall CM, Zhou J, Lynch G (2002) Uptake and pathogenic effects of amyloid beta peptide 1-42 are enhanced by integrin antagonists and blocked by NMDA receptor antagonists. *Neuroscience* 112: 827–840.
- Jeon YJ, Won HY, Moon MY, Choi WH, Chang CH, et al. (2008) Interaction of microglia and amyloid-beta through beta2-integrin is regulated by RhoA. *Neuroreport* 19: 1661–1665.

50. Wright S, Malinin NL, Powell KA, Yednock T, Rydel RE, et al. (2007) Alpha2beta1 and alphaVbeta1 integrin signaling pathways mediate amyloid-beta-induced neurotoxicity. *Neurobiol Aging* 28: 226–237.
51. Silverstein RL, Febbraio M (2009) CD36, a scavenger receptor involved in immunity, metabolism, angiogenesis, and behavior. *Sci Signal* 2: re3.
52. Giokarini T, Bonafini L, Shearman MS, Hill RG, Longmore J (1997) beta-Amyloid (A beta 1-40)-evoked changes in vascular reactivity are mediated via an endothelium-specific mechanism: studies using rabbit isolated aorta. *Ann N Y Acad Sci* 826: 475–478.
53. Li QX, Whyte S, Tanner JE, Evin G, Beyreuther K, et al. (1998) Secretion of Alzheimer's disease Abeta amyloid peptide by activated human platelets. *Lab Invest* 78: 461–469.
54. Smith CCT, Hyatt PJ, Stanyer L, Betteridge DJ (2001) Platelet secretion of [beta]-amyloid is increased in hypercholesterolaemia. *Brain Research* 896: 161–164.
55. Yamashita S, Hirano K, Kuwasako T, Janabi M, Toyama Y, et al. (2007) Physiological and pathological roles of a multi-ligand receptor CD36 in atherogenesis; insights from CD36-deficient patients. *Mol Cell Biochem* 299: 19–22.
56. Schini V, Grant NJ, Miller RC, Takeda K (1988) Morphological characterization of cultured bovine aortic endothelial cells and the effects of atriopeptin II and sodium nitroprusside on cellular and extracellular accumulation of cyclic GMP. *Eur J Cell Biol* 47: 53–61.
57. Gillis S, Watson J (1980) Biochemical and biological characterization of lymphocyte regulatory molecules. V. Identification of an interleukin 2-producing human leukemia T cell line. *J Exp Med* 152: 1709–1719.
58. Blasi E, Barluzzi R, Bocchini V, Mazzolla R, Bistoni F (1990) immortalization of murine microglial cells by a v-raf/v-myc carrying retrovirus. *J Neuroimmunol* 27: 229–237.
59. Isenberg JS, Romeo MJ, Maxhimer JB, Smedley J, Frazier WA, et al. (2008) Gene silencing of CD47 and antibody ligation of thrombospondin-1 enhance ischemic tissue survival in a porcine model: implications for human disease. *Ann Surg* 247: 860–868.
60. Piccio L, Vermi W, Boles KS, Fuchs A, Strader CA, et al. (2005) Adhesion of human T cells to antigen-presenting cells through SIRPbeta2-CD47 interaction costimulates T-cell proliferation. *Blood* 105: 2421–2427.
